# Supplementary material for: Photocatalytic degradation of unsymmetrical dimethylhydrazine on TiO2/SBA-15 under 185/254 nm vacuum-ultraviolet
Source: Royal Society of Chemistry journal article supplement (doi:10.1039/d1ra03599a), 2021-01-01
Supplement: d1ra03599a1.pdf [file d1ra03599a1.pdf]

## Electronic Supplementary Information

### Photocatalytic degradation of unsymmetrical dimethylhydrazine on TiO<sub>2</sub>/SBA-15 under 185/254 nm vacuum-ultraviolet

Yuanzheng Huang <sup>a</sup>, Ying Jia <sup>a, \*</sup>, Ruomeng Hou <sup>a</sup>, Zhiyong Huang <sup>a</sup>, Keke Shen <sup>a</sup>,  
Guofeng Jin <sup>a</sup>, Li'an Hou <sup>a</sup>

<sup>a</sup> Xi'an High Technology Institute, Xi'an 710025, China.

**Corresponding Author\***

\*E-mail: [jysx603@yeah.net](mailto:jysx603@yeah.net)

This supplementary material portion contains 3 texts, 14 figures and 1 table.

|          |                                                                            |
|----------|----------------------------------------------------------------------------|
| Text S1. | Quantitative analysis of unsymmetrical dimethylhydrazine (UDMH).           |
| Text S2. | Details of GC/MS conditions for analysis of UDMH intermediates.            |
| Text S3. | Preparation of TiO <sub>2</sub> by hydrolysis method.                      |
| Fig. S1  | The experimental set-up of the PCD reactor.                                |
| Fig. S2  | The calibration curve of UDMH solution.                                    |
| Fig. S3  | EDS images of the samples.                                                 |
| Fig. S4  | HRTEM image of TiO <sub>2</sub> nanoparticle encapsulated in TS-2.         |
| Fig. S5  | XPS spectra of TS-2 survey spectra.                                        |
| Fig. S6  | The UV absorption curve of UDMH at 190~500 nm.                             |
| Fig. S7  | GC/MS spectrum of intermediate product: Dimethylamino acetonitrile.        |
| Fig. S8  | GC/MS spectrum of intermediate product: Hydrazinecarboxamide.              |
| Fig. S9  | GC/MS spectrum of intermediate product: Methyl formamide.                  |
| Fig. S10 | GC/MS spectrum of intermediate product: Formamide.                         |
| Fig. S11 | GC/MS spectrum of intermediate product: Dimethylformamide.                 |
| Fig. S12 | GC/MS spectrum of intermediate product: Methanol.                          |
| Fig. S13 | GC/MS spectrum of intermediate product: Acetic acid.                       |
| Fig. S14 | GC/MS spectrum of intermediate product: N-Nitrosodimethylamine.            |
| Table S1 | The intermediate products for the degradation of UDMH in VUV/TS-2 process. |

**Text S1.** Quantitative analysis of unsymmetrical dimethylhydrazine (UDMH)

Trace amounts of UDMH react with amino ferrocyanide sodium in a weakly acidic aqueous solution and form a red complex (S1). In the measurement range, the absorbance measured at 500 nm with a spectrophotometer is proportional to the concentration of UDMH. In this part, the calibration curve of UDMH solution at different concentration ranging from 0.08 - 0.52 mg·L<sup>-1</sup> was made and displayed in Fig. S2.

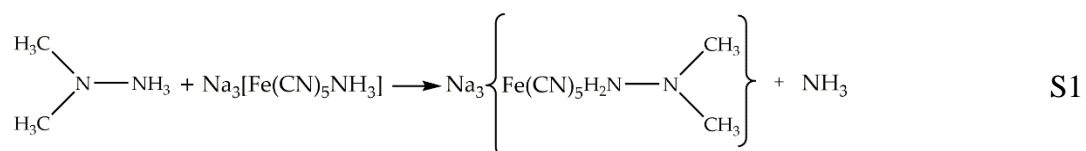

**Text S2.** Details of GC/MS conditions for analysis of UDMH intermediates.

The GC/MS column used was PE Elite-WAX ETR (30 m \* 0.25  $\mu\text{m}$  \* 0.25 mm) polar capillary column. The flow rate of carrier gas (He) was 1.5 mL  $\text{min}^{-1}$ . The injection volume was 1  $\mu\text{L}$  in a split mode at the split ratio of 10:1. The pre-injection sample washes was two. The temperature of injector was 150  $^{\circ}\text{C}$ . An oven isothermal program was held at 50  $^{\circ}\text{C}$  for 1 min, then ramped up to 100  $^{\circ}\text{C}$  for 1 min (10  $^{\circ}\text{C min}^{-1}$ ), and finally ramped up to 180  $^{\circ}\text{C}$  for 1 min (10  $^{\circ}\text{C min}^{-1}$ ). The mass spectrometer was performed in a full scan mode and collected data from  $m/z$  30-100 amu with 1.9 min of solvent delay. Electron impact ionization was 70 eV and an ion source temperature was 200  $^{\circ}\text{C}$ .

**Text S3.** Preparation of TiO<sub>2</sub> by hydrolysis method.

TiO<sub>2</sub> prepared by hydrolysis method via the following steps: 10 mL titanium butoxide was added into a three-necked flask containing 100 mL water under magnetic stirring conditions. After aging for 24 h, the slurry was filtered, washed by water, dried at 60 °C and calcined at 500 °C for 4 h in air. The sample was denoted as H-TiO<sub>2</sub>, and the specific surface area of H-TiO<sub>2</sub> was 185.46 m<sup>2</sup>·g<sup>-1</sup>.

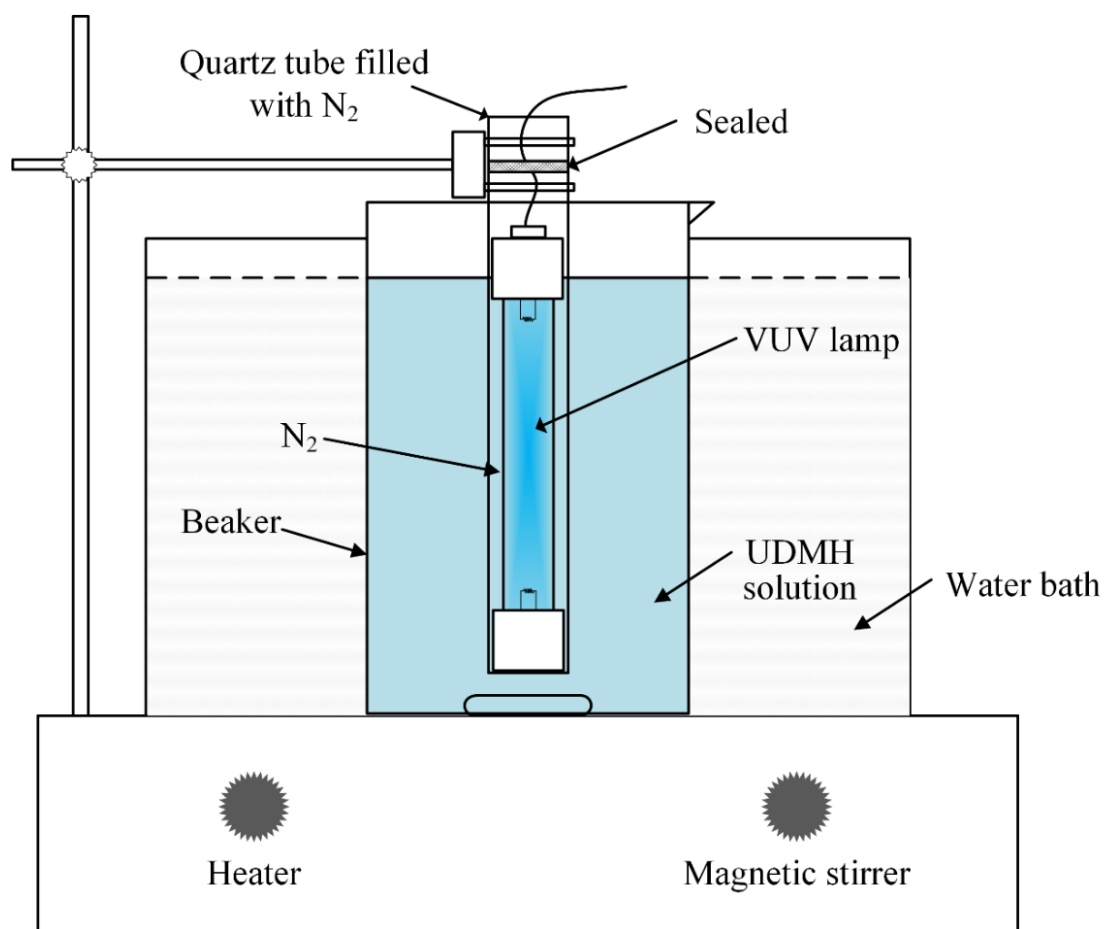

Fig. S1. The experimental set-up of the PCD reactor.

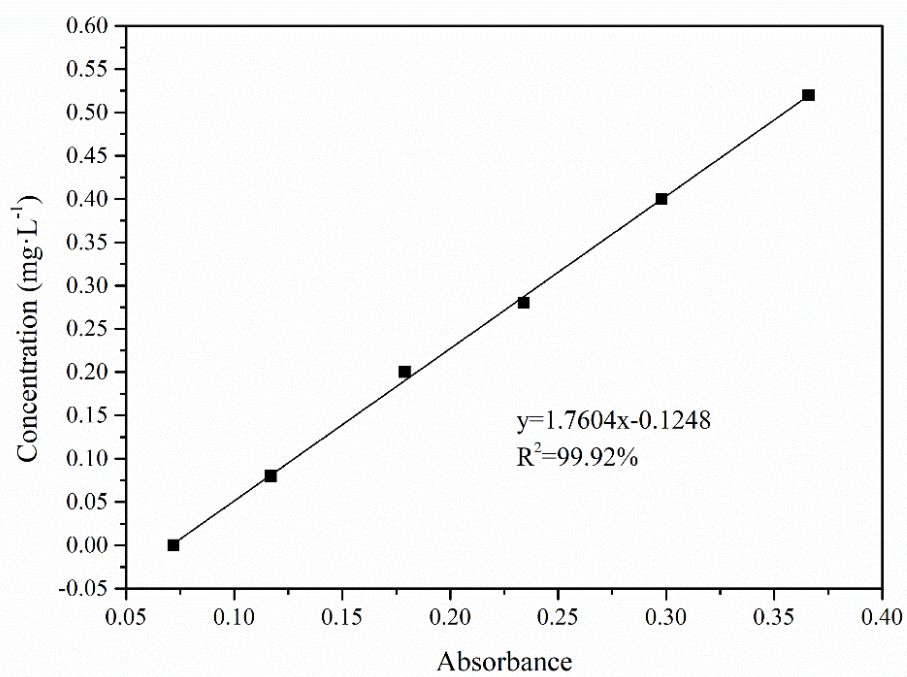

Fig. S2. The calibration curve of UDMH solution.

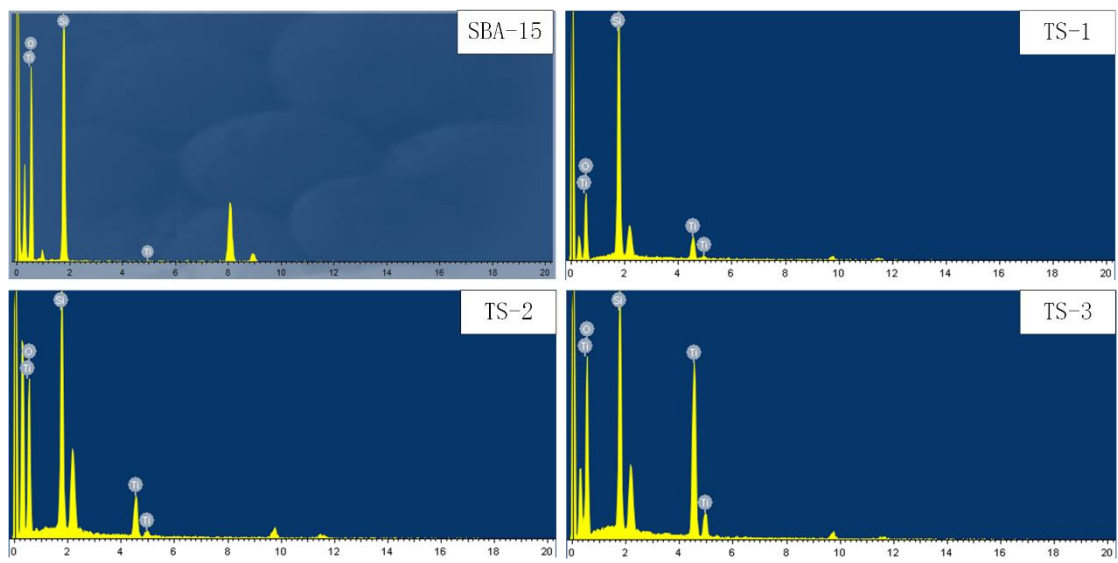

Fig. S3. EDS images of the samples.



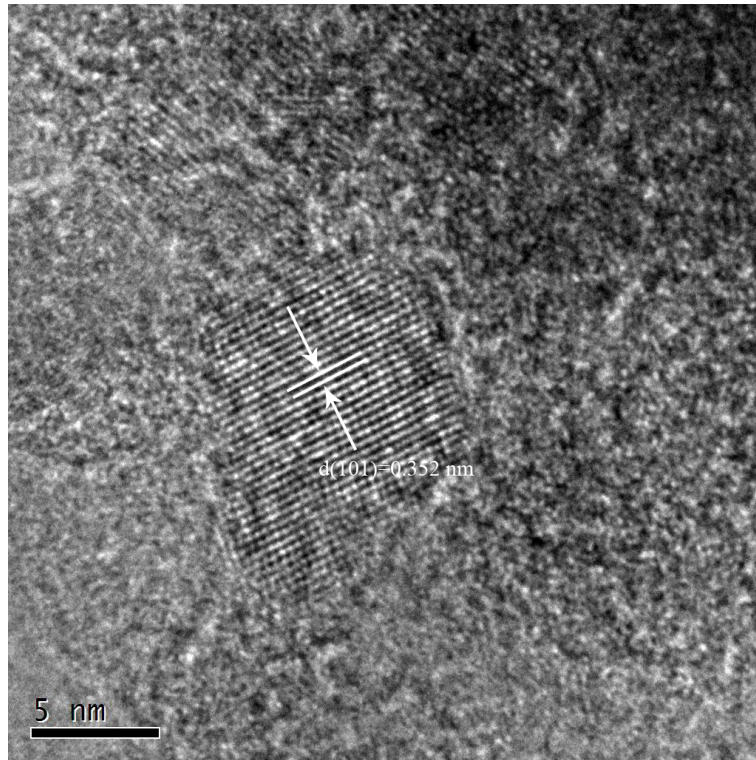

Fig. S4. HRTEM image of TiO<sub>2</sub> nanoparticle encapsulated in TS-2.

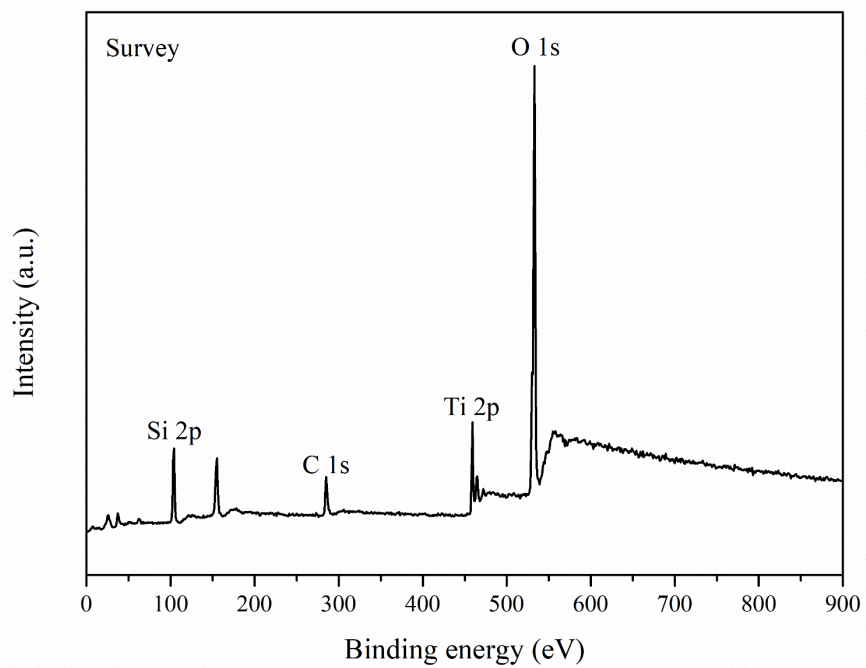

Fig. S5. XPS spectra of TS-2 survey spectra.

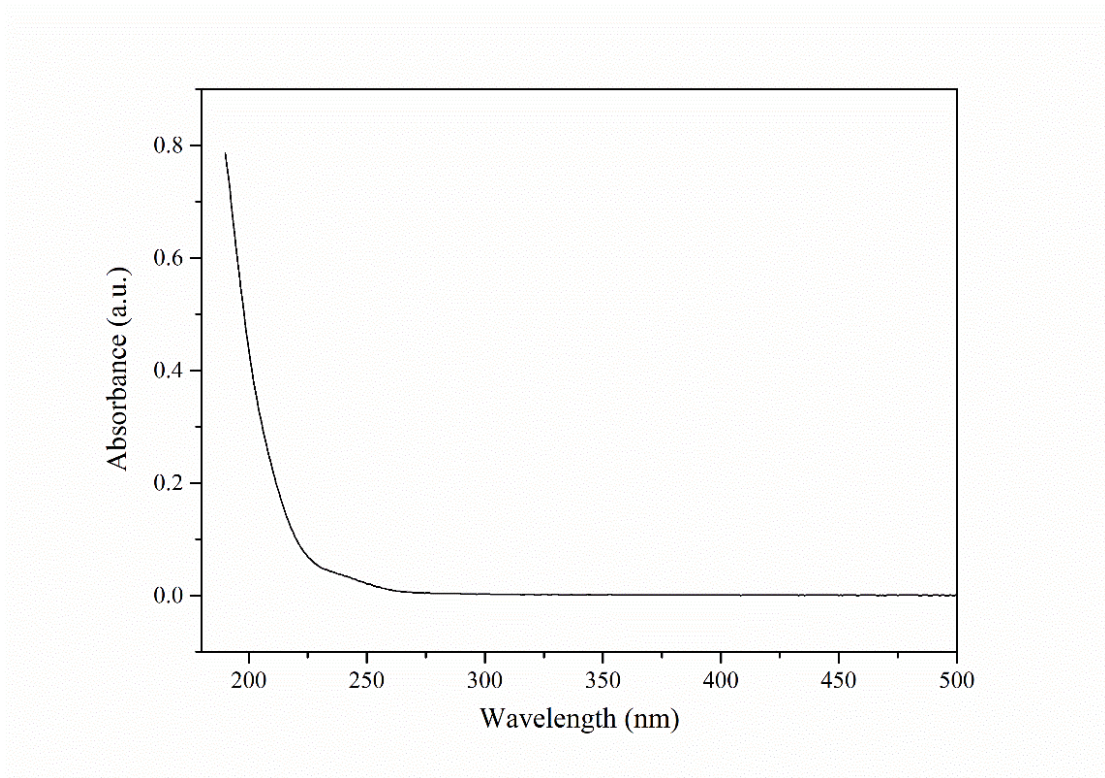

Fig. S5. The UV absorption curve of UDMH at 190~500 nm.

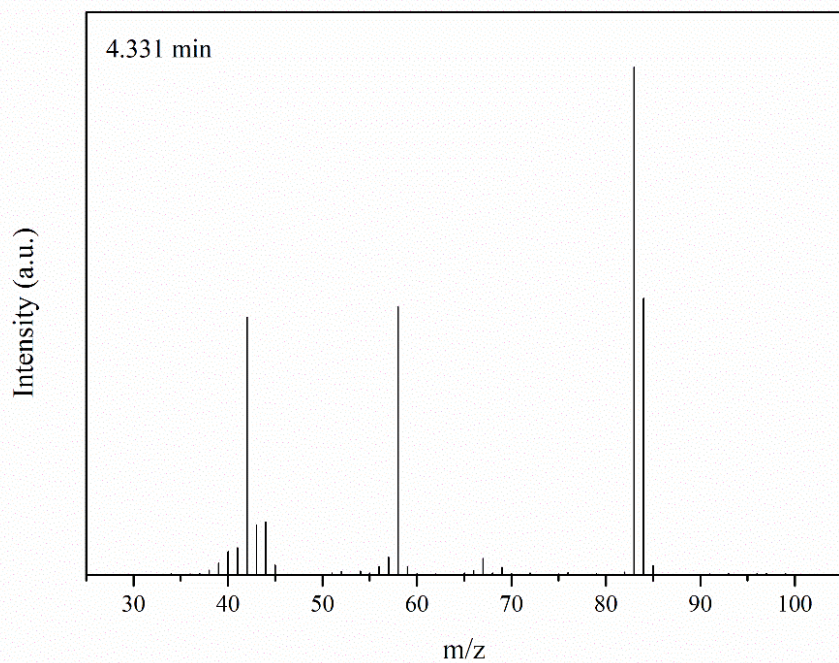

Fig. S6. GC/MS spectrum of intermediate product: Dimethylamino acetonitrile.

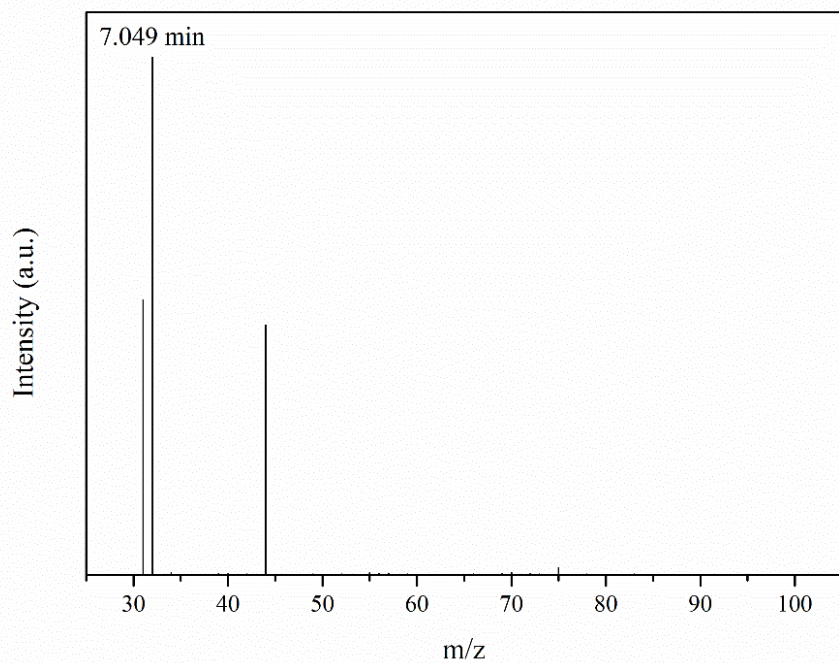

Fig. S7. GC/MS spectrum of intermediate product: Hydrazinecarboxamide.

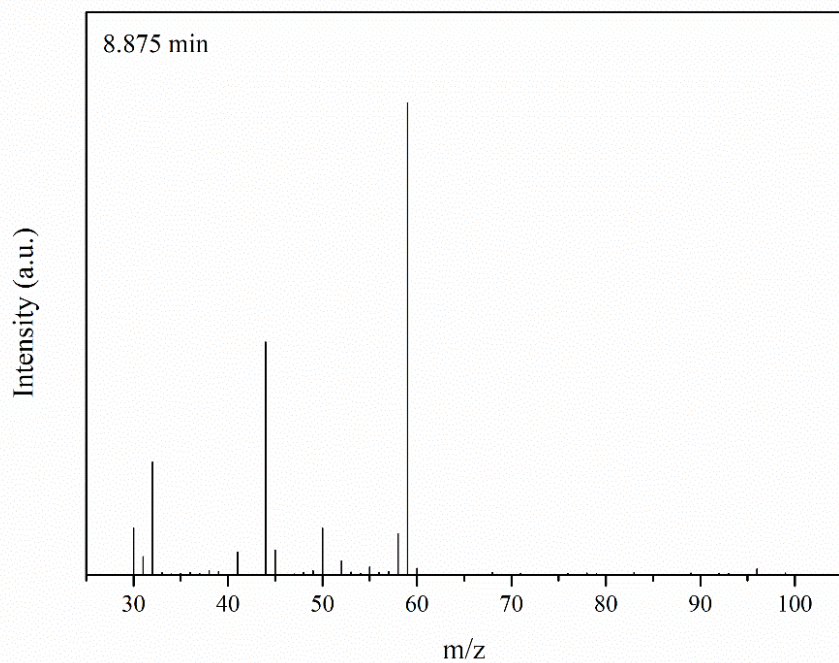

Fig. S8. GC/MS spectrum of intermediate product: Methyl formamide.

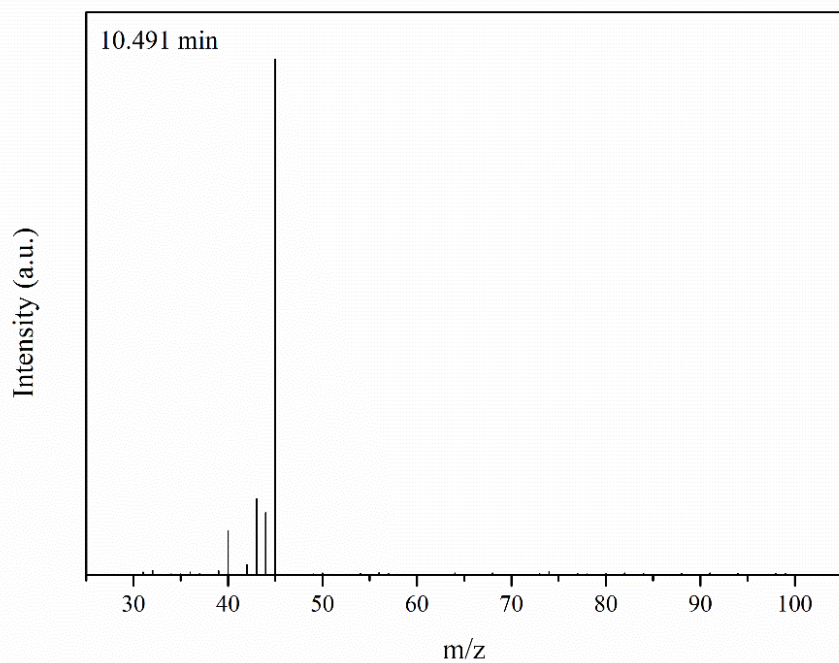

Fig. S9. GC/MS spectrum of intermediate product: Formamide.

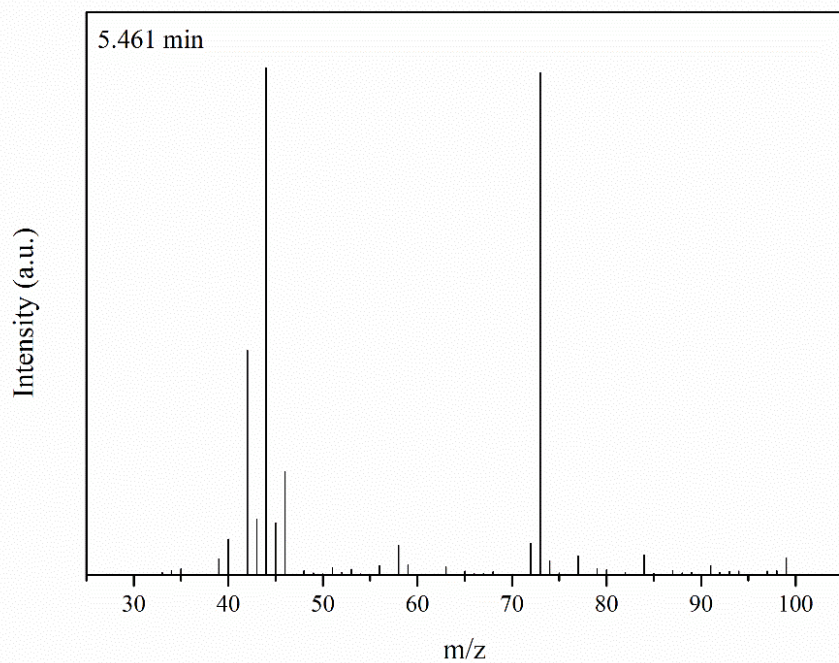

Fig. S10. GC/MS spectrum of intermediate product: Dimethylformamide.



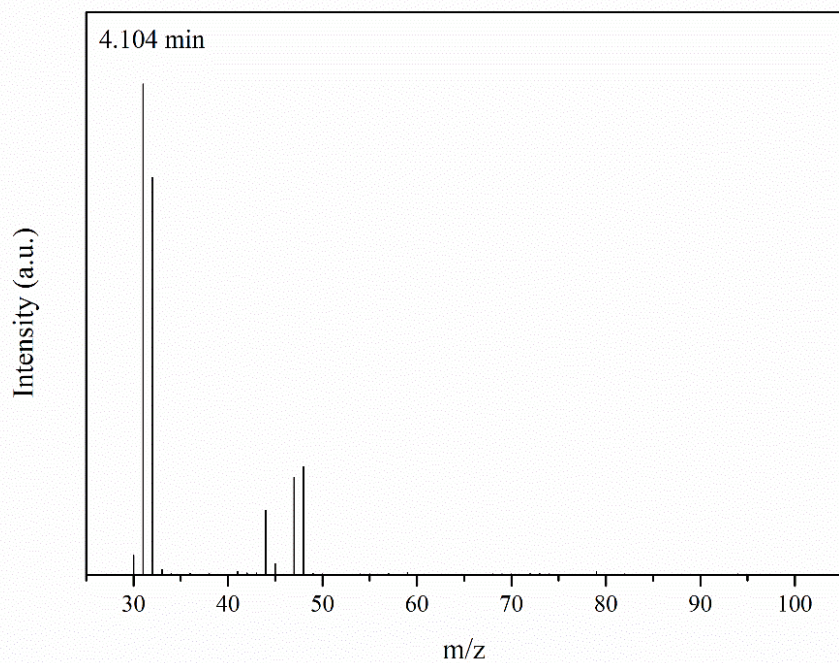

Fig. S11. GC/MS spectrum of intermediate product: Methanol.

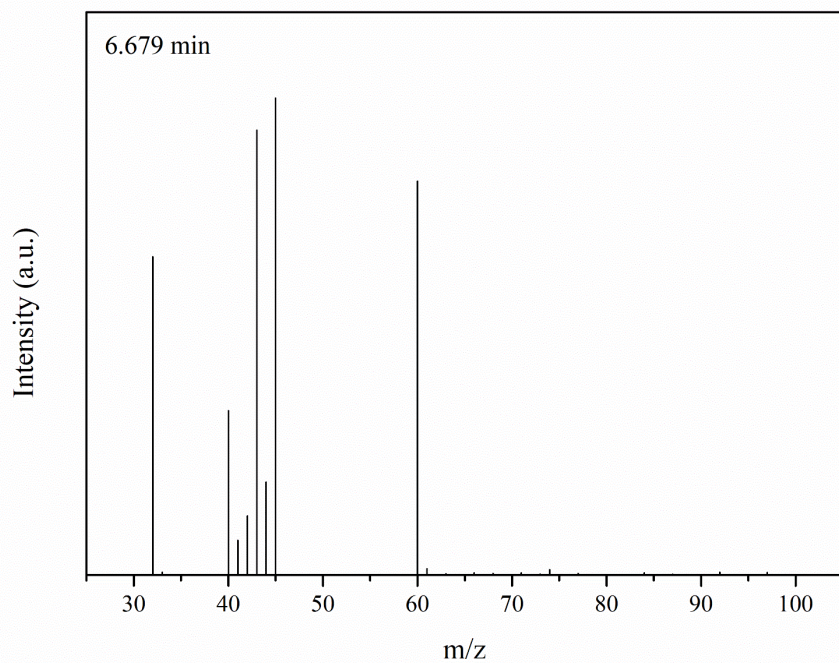

Fig. S12. GC/MS spectrum of intermediate product: Acetic acid.

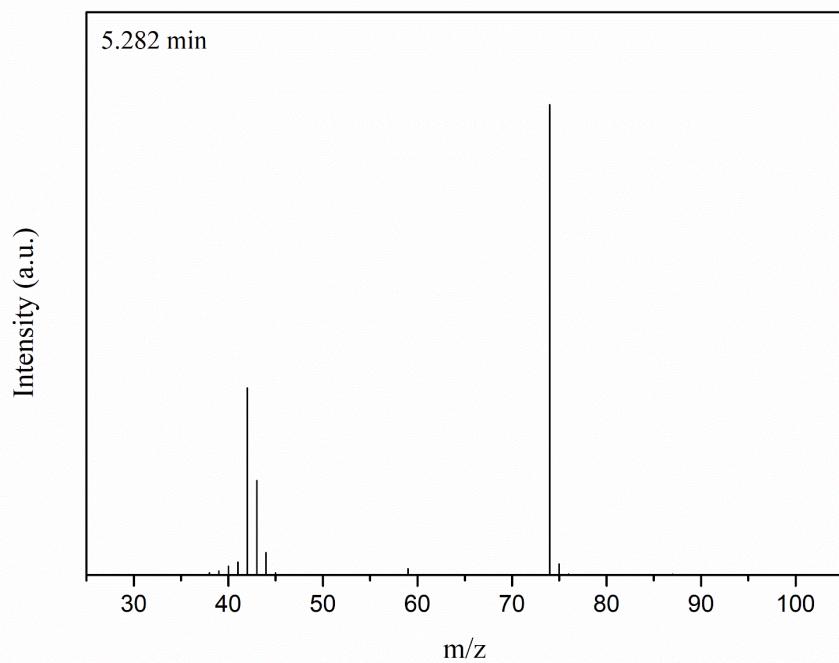

Fig. S13. GC/MS spectrum of intermediate product: N-Nitrosodimethylamine.

Table S1. The intermediate products for the degradation of UDMH in VUV/TS-2 process.

| Rank* | Retention time (min) | Name                       | CAS      | Chemical structure                                                                    | Exact mass (m/z) |
|-------|----------------------|----------------------------|----------|---------------------------------------------------------------------------------------|------------------|
| 1     | 4.331                | Dimethylamino acetonitrile | 926-64-7 | 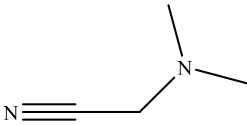    | 84               |
| 2     | 7.049                | Hydrazine carboxamide      | 57-56-7  |     | 75               |
| 3     | 8.875                | Methyl formamide           | 123-39-7 |    | 59               |
| 4     | 10.491               | Formamide                  | 75-12-7  |    | 45               |
| 5     | 5.461                | Dimethylformamide          | 68-12-2  |    | 73               |
| 6     | 4.104                | Methanol                   | 67-56-1  |  | 32               |
| 7     | 6.679                | Acetic acid                | 64-19-7  |  | 60               |
| 8     | 5.282                | N-Nitrosodimethylamine     | 62-75-9  |  | 74               |

\*Ranked by peak intensity.
